# Supplementary figures and images for: Influence of intrinsic spin ordering in La0.6Sr0.4Co0.8Fe0.2O3−δ and Ba0.6Sr0.4Co0.8Fe0.2O3−δ towards electrocatalysis of oxygen redox reaction in solid oxide cell
Source: Royal Society of Chemistry journal article supplement (doi:10.1039/d4ra05191b), 2024-01-01

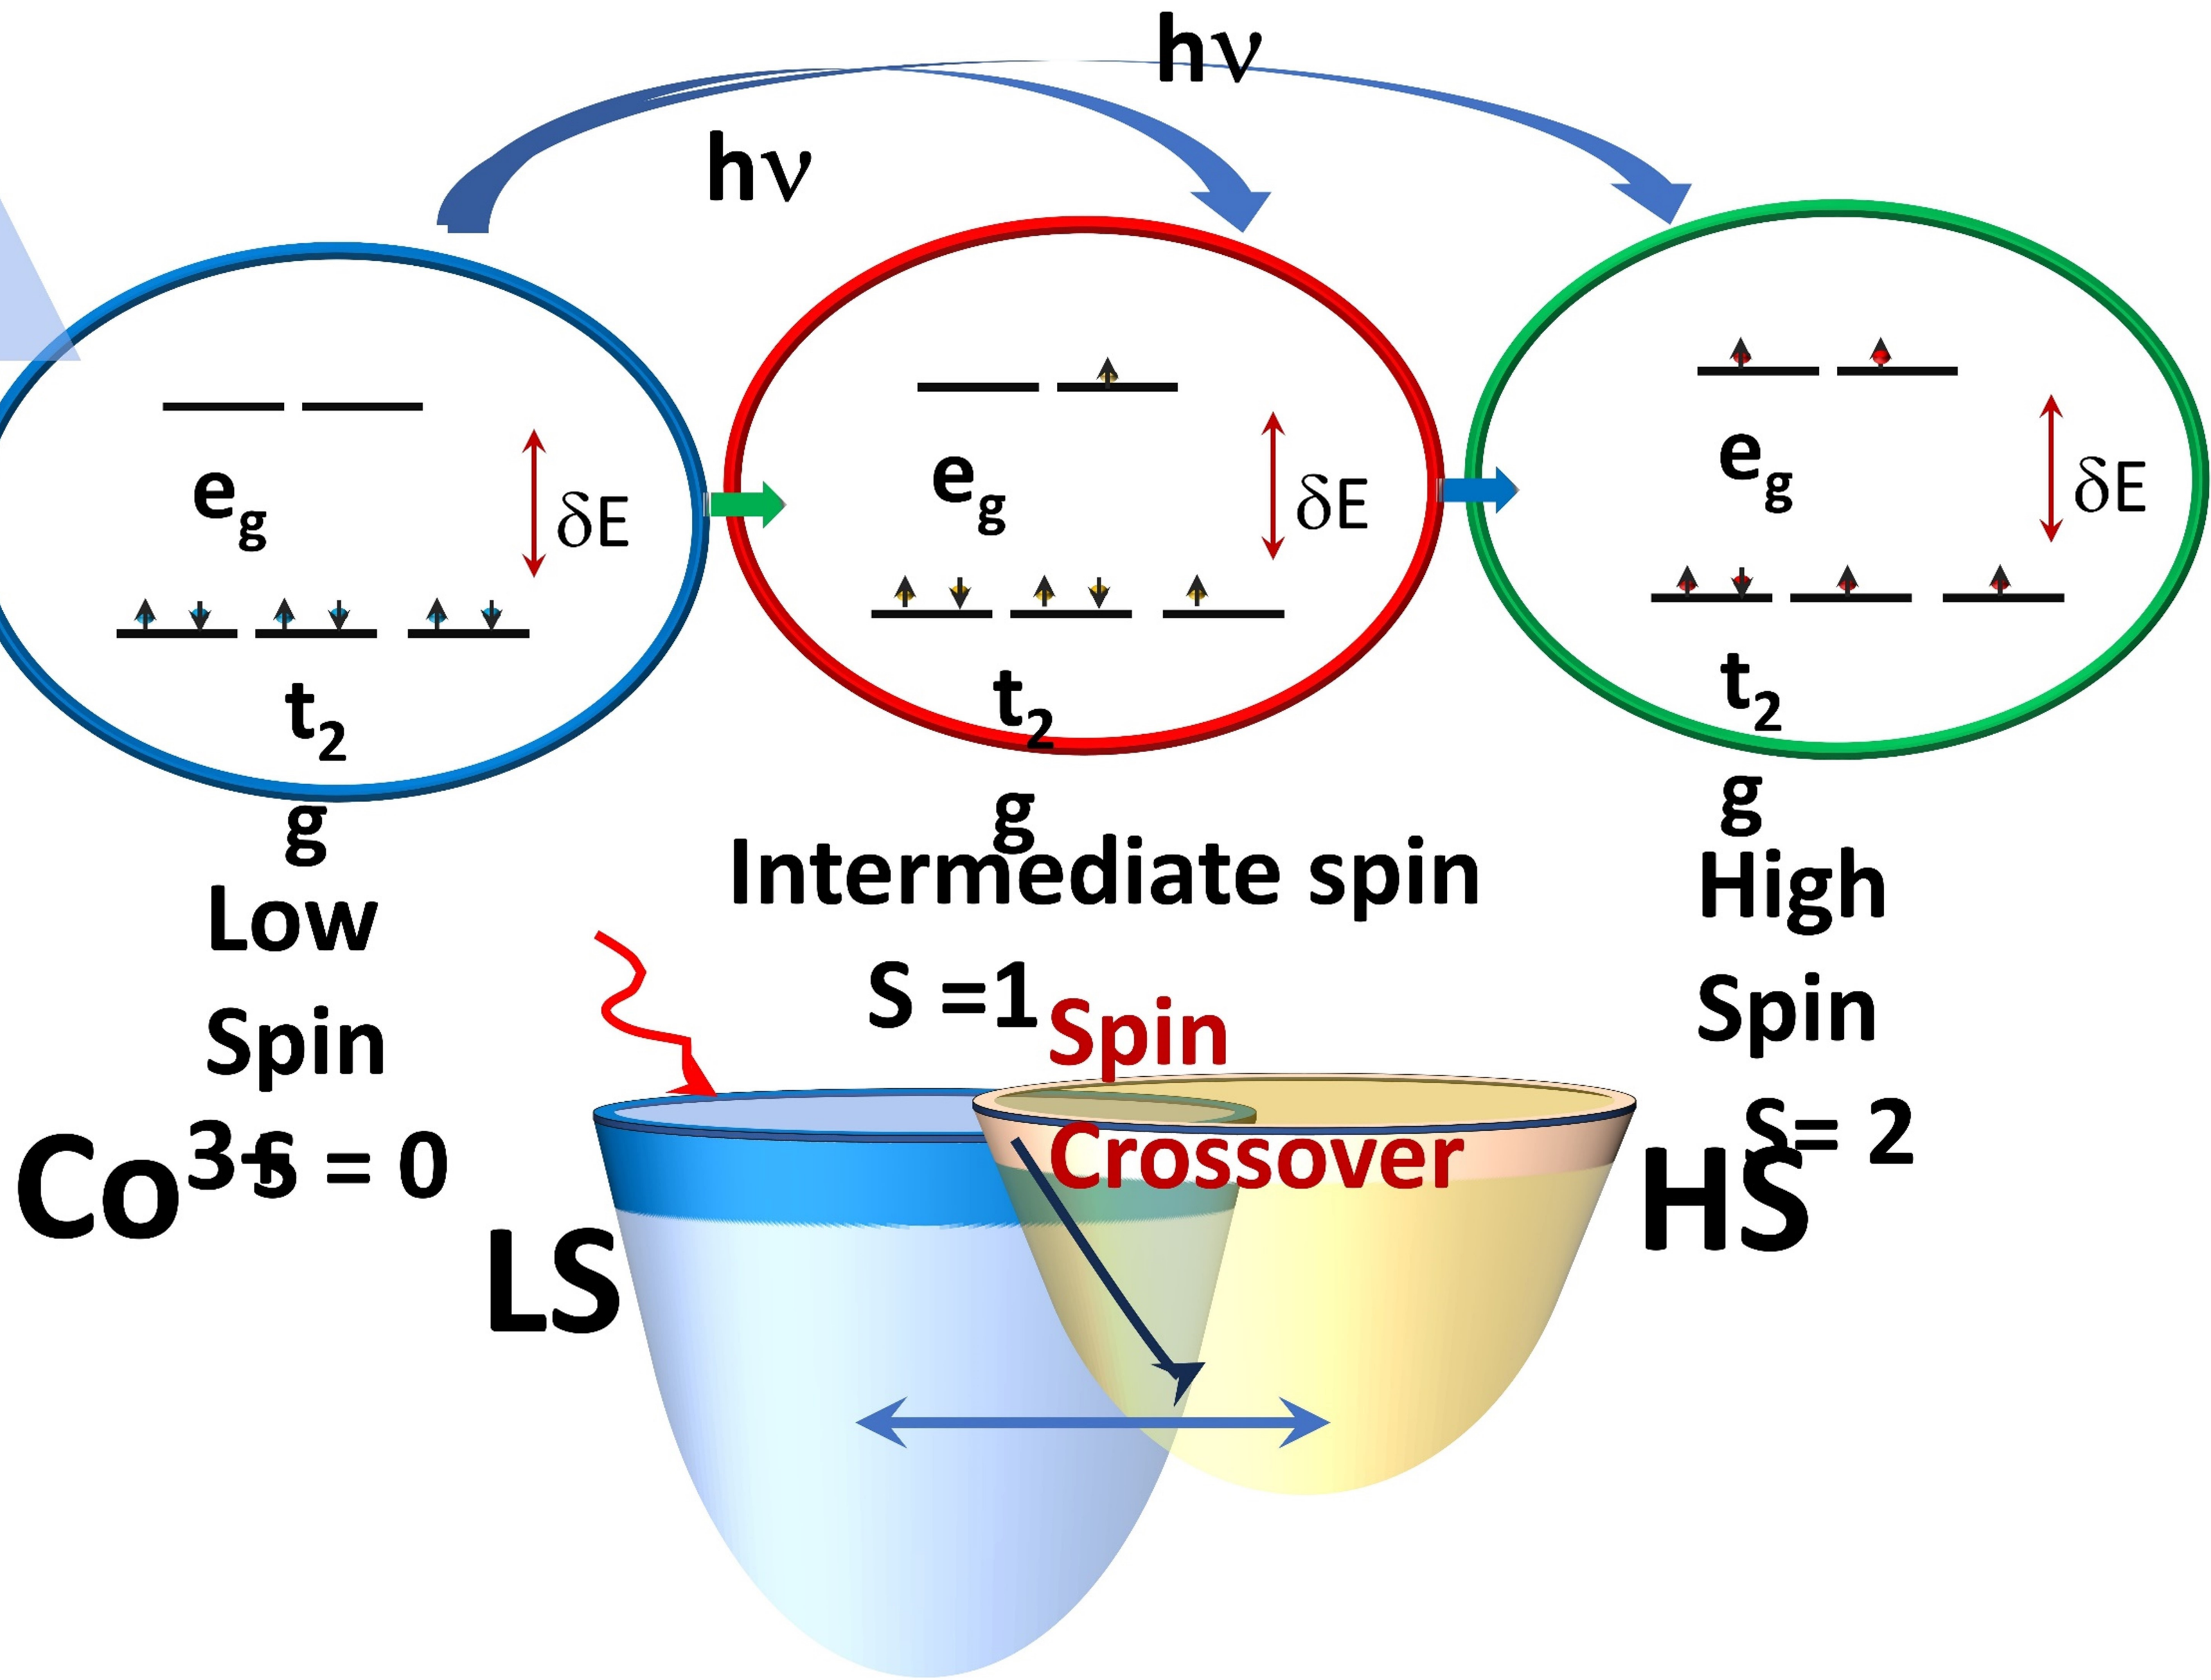

Supplement: d4ra05191b2.pdf [file d4ra05191b2.pdf]

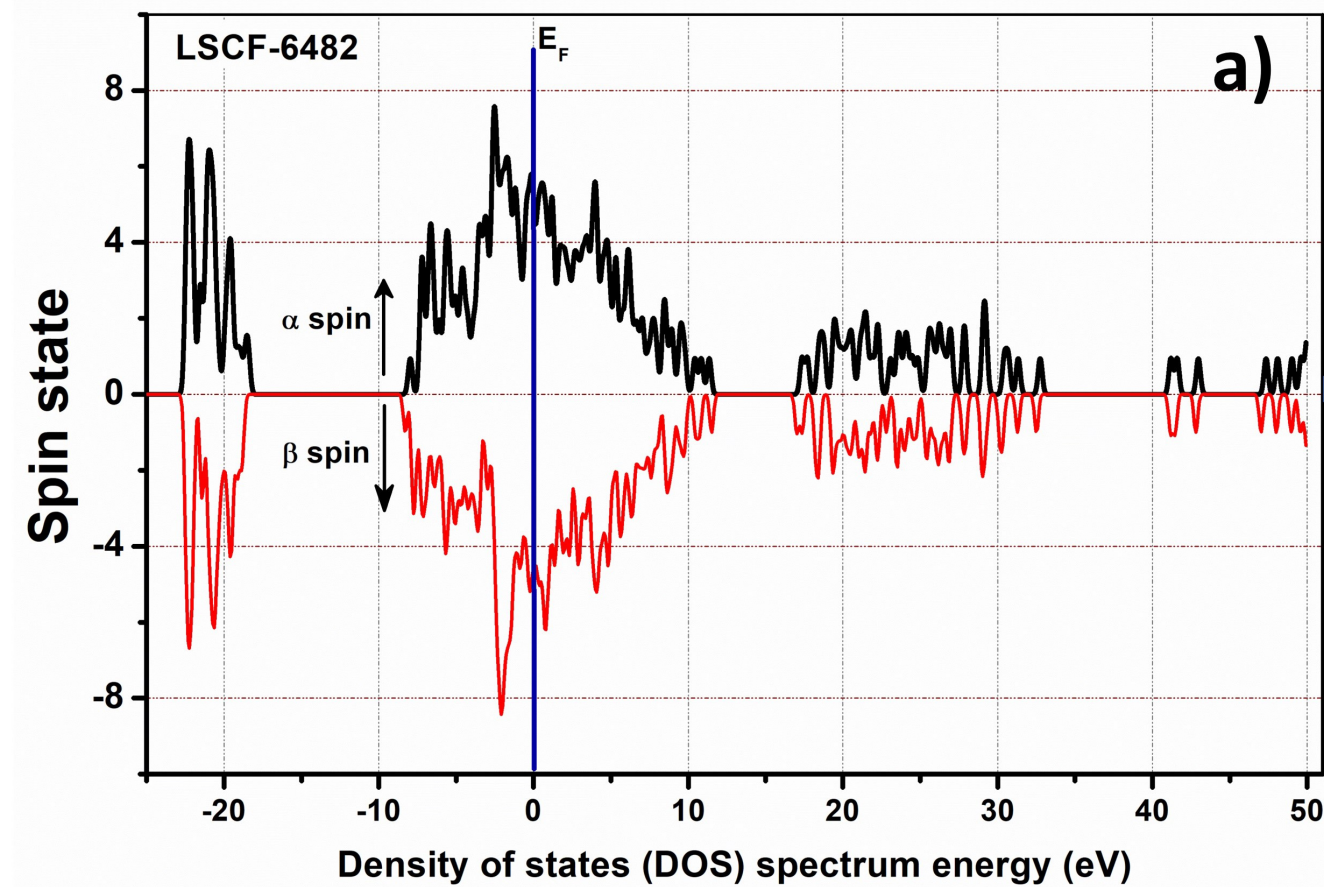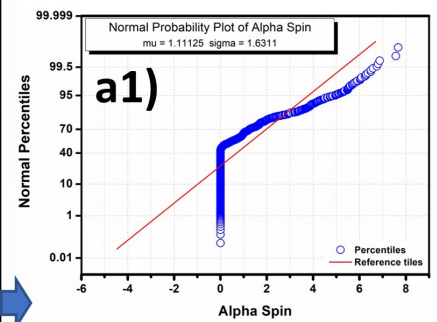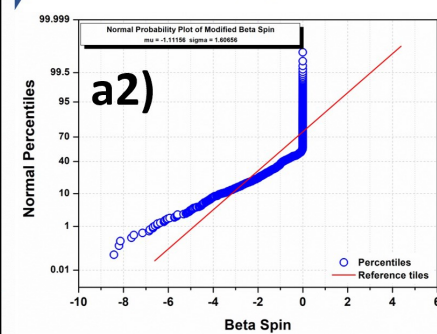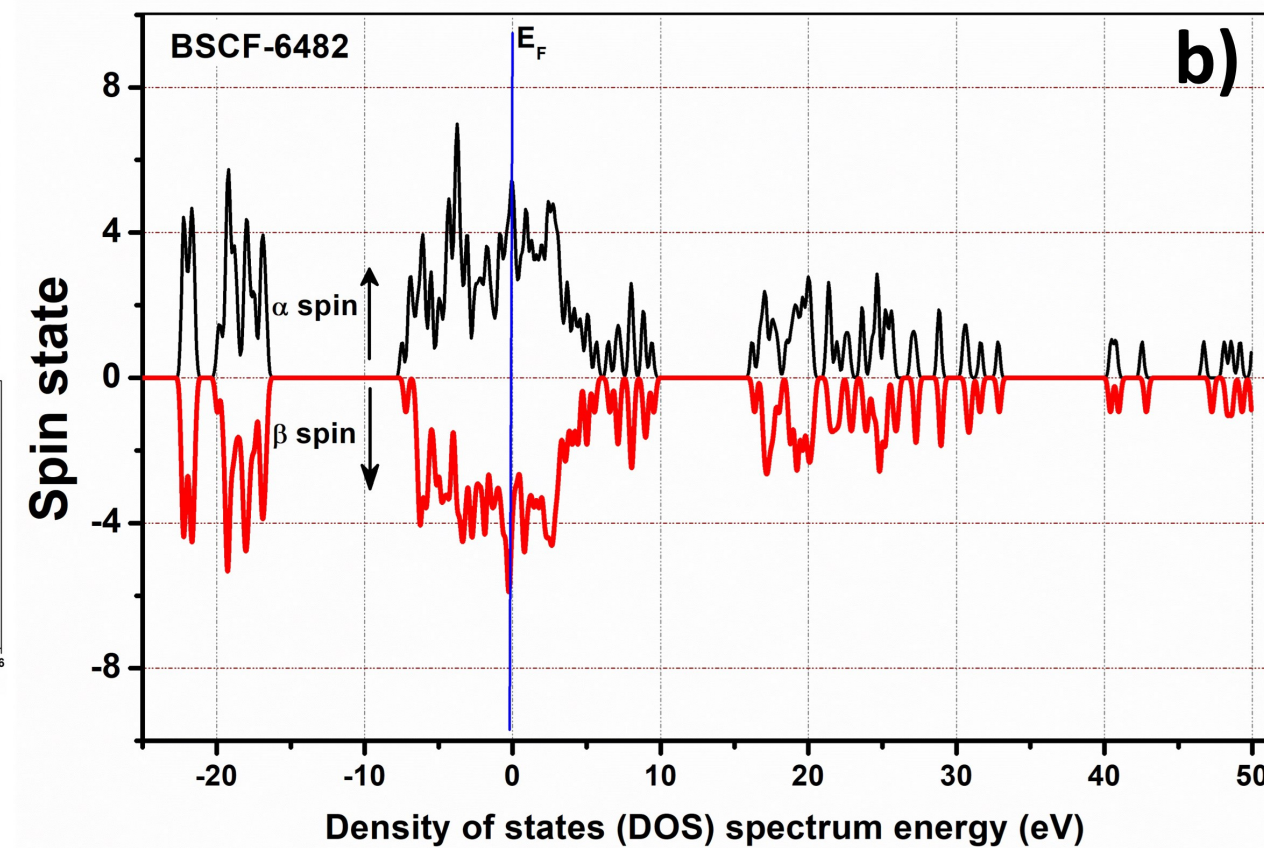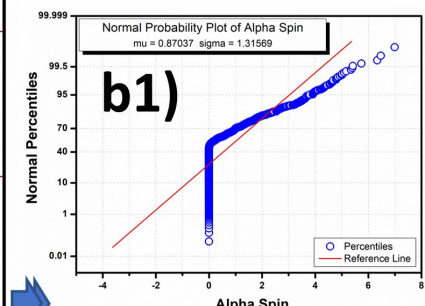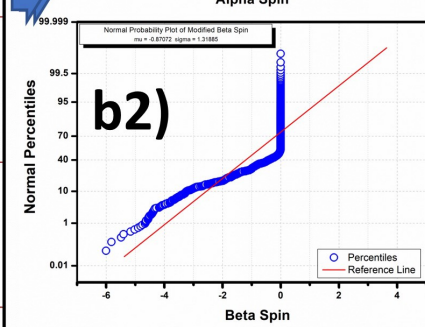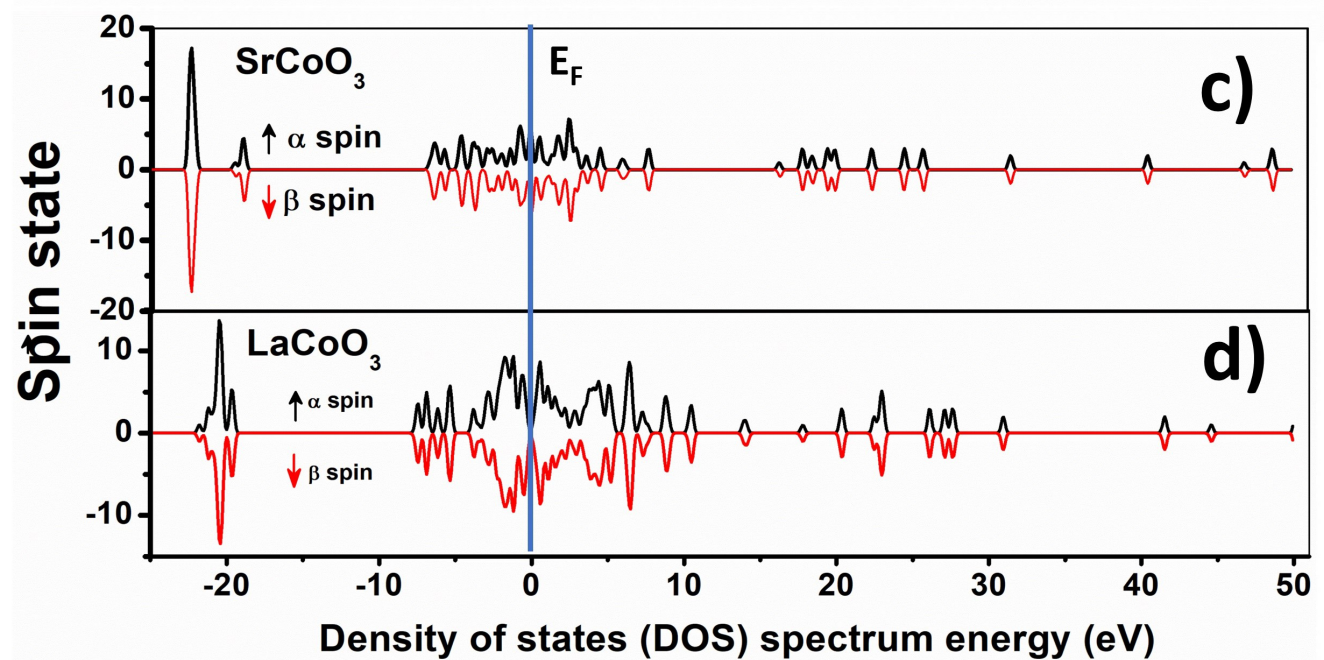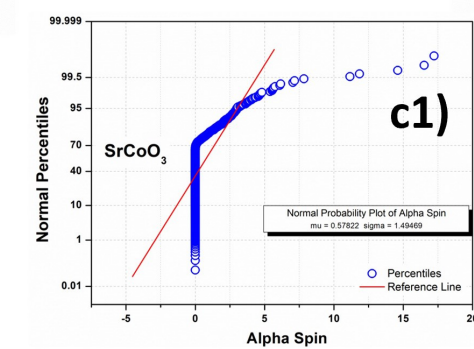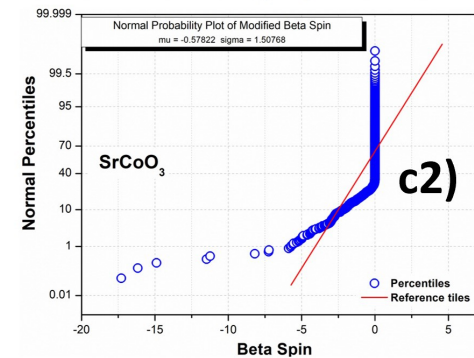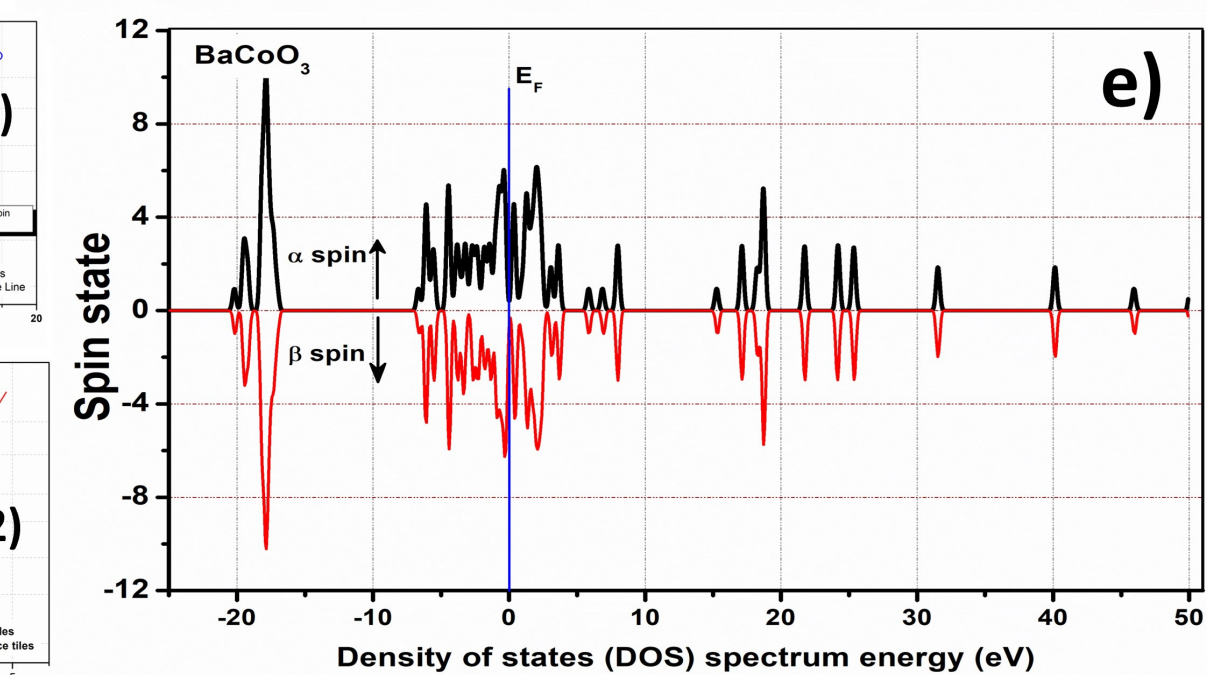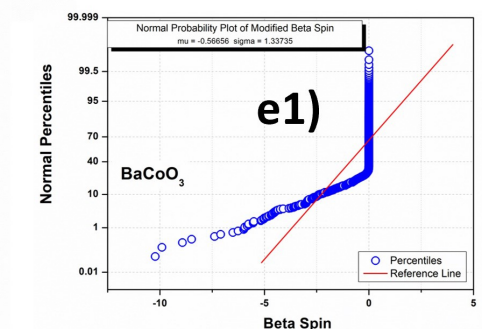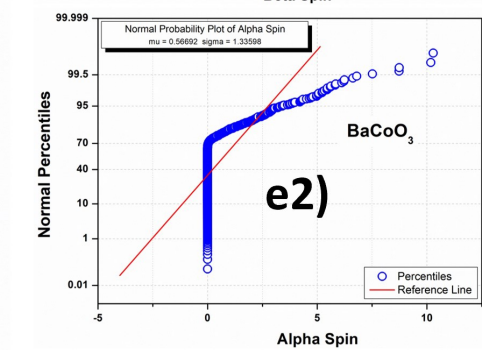

Supplement: d4ra05191b3.pdf [file d4ra05191b3.pdf]

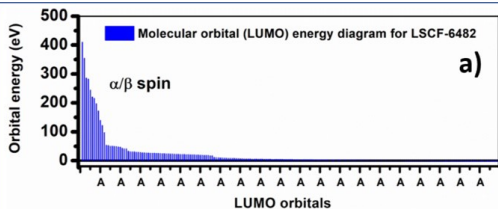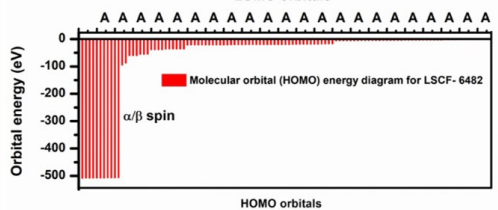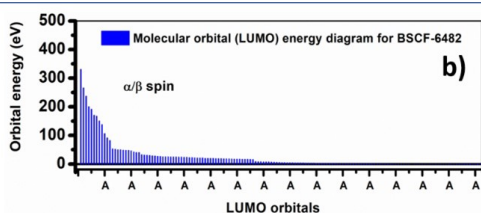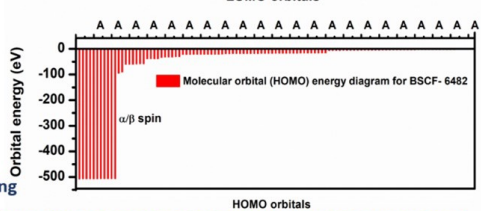

Doping

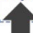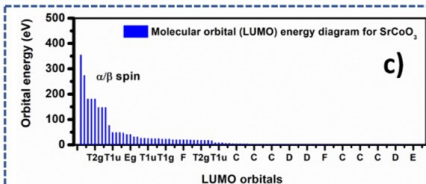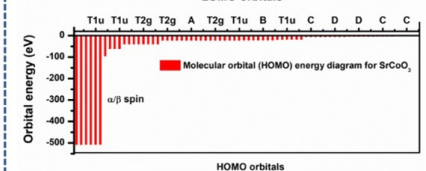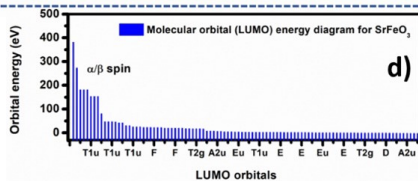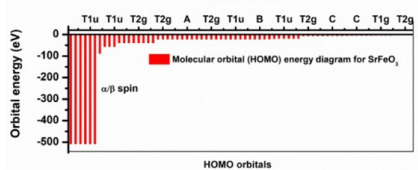

Supplement: d4ra05191b4.pdf [file d4ra05191b4.pdf]

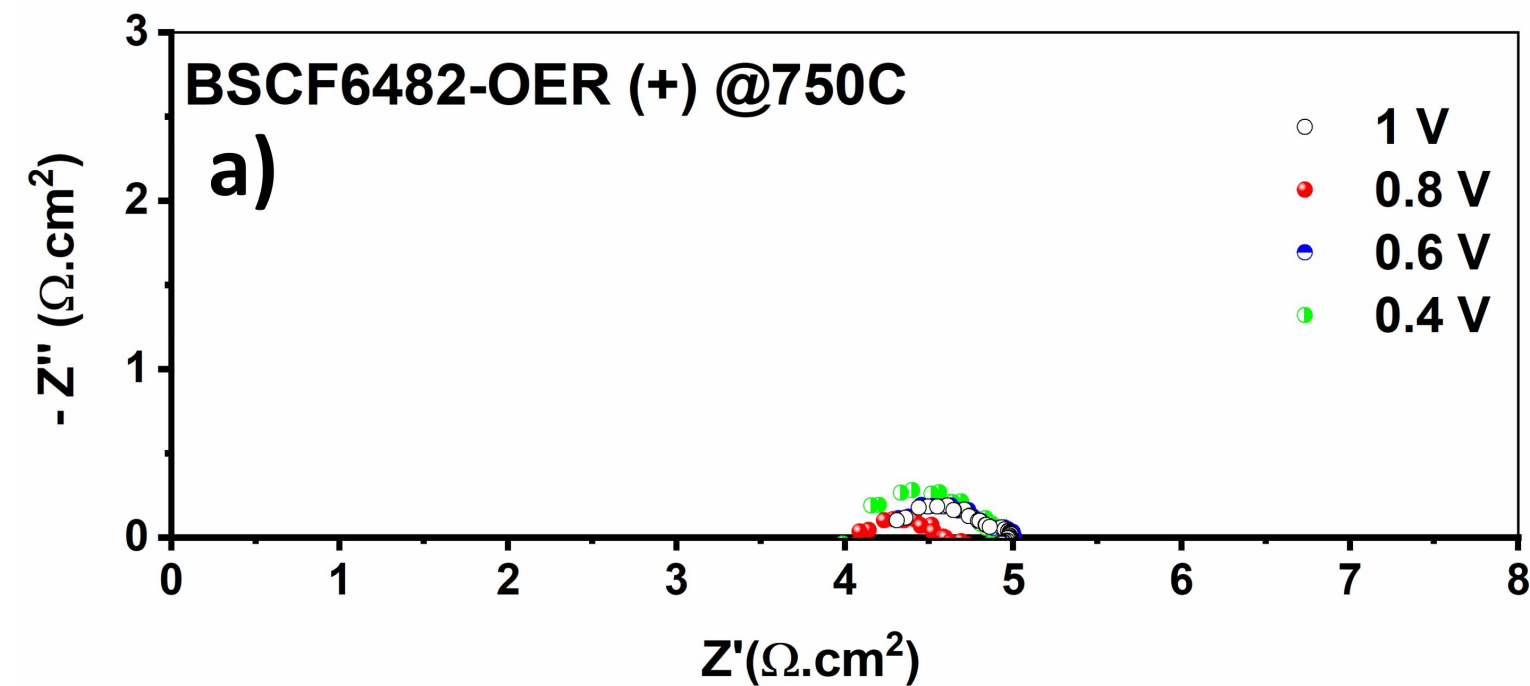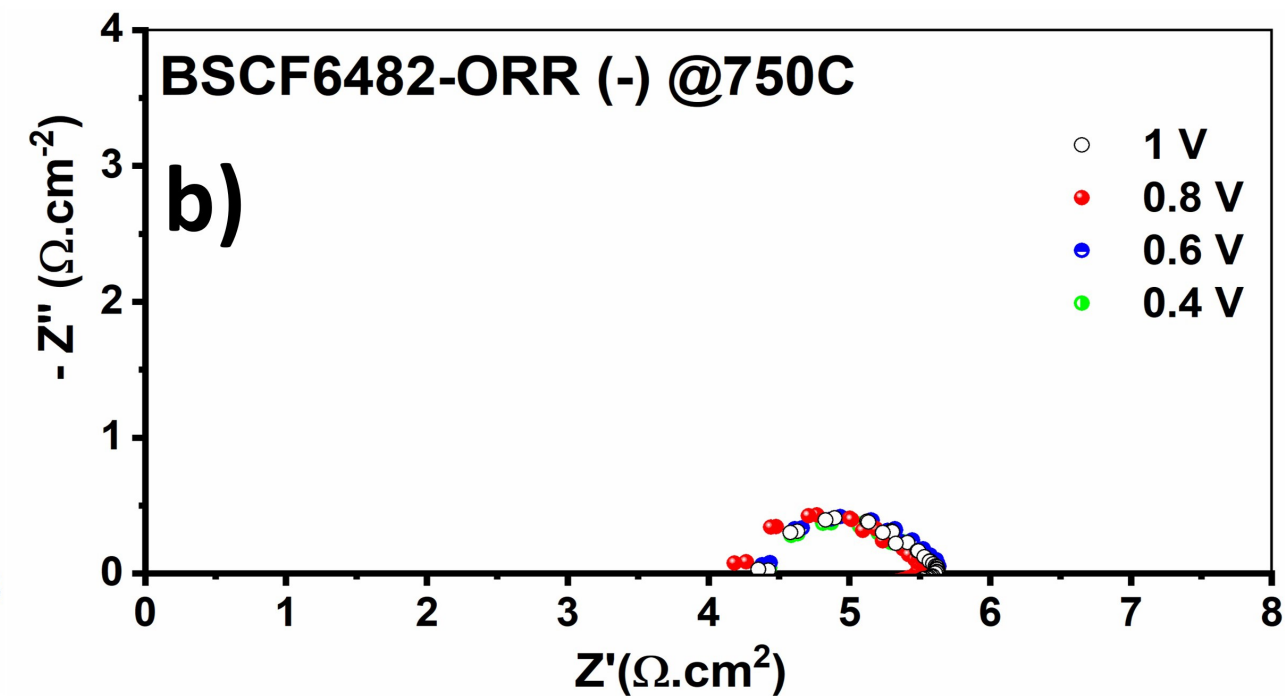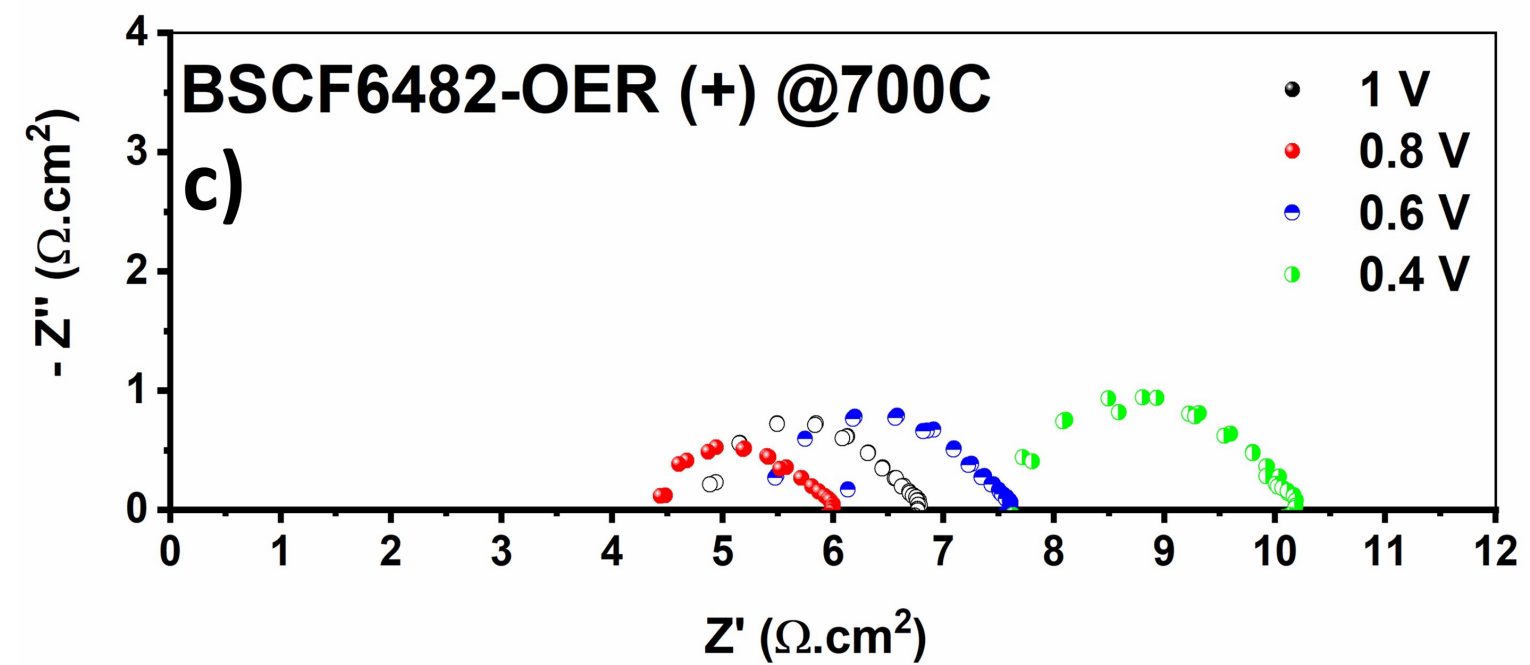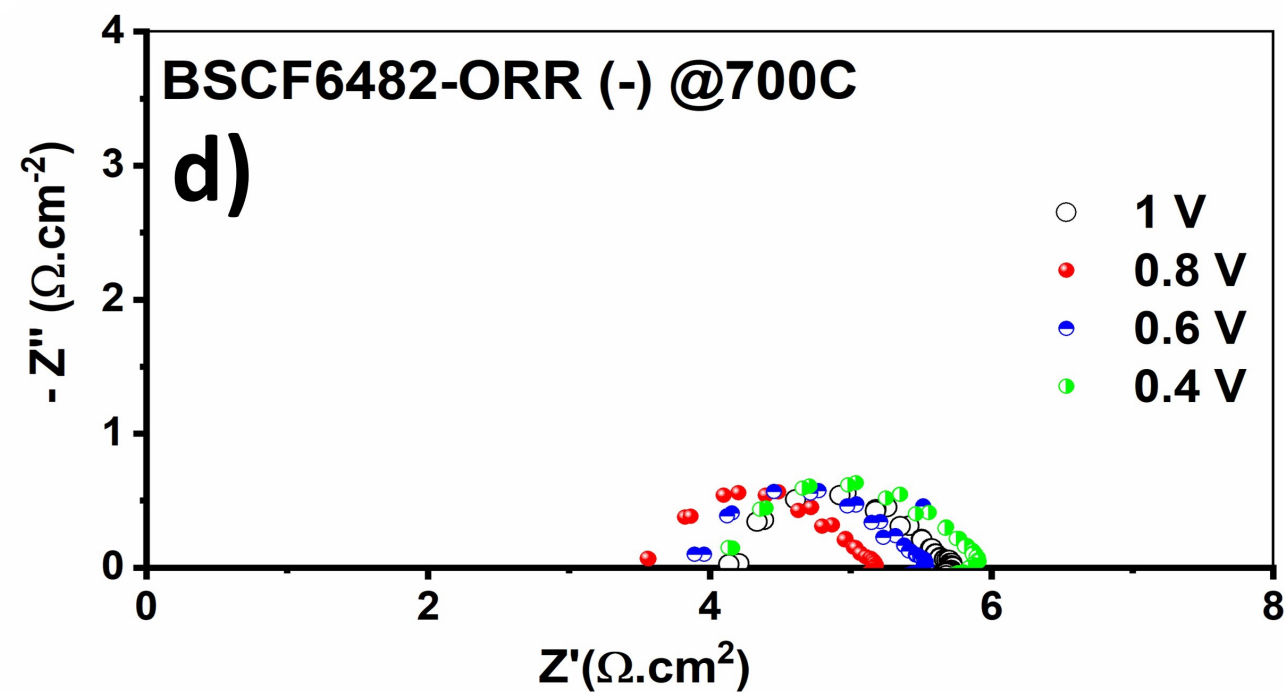

Supplement: d4ra05191b5.pdf [file d4ra05191b5.pdf]

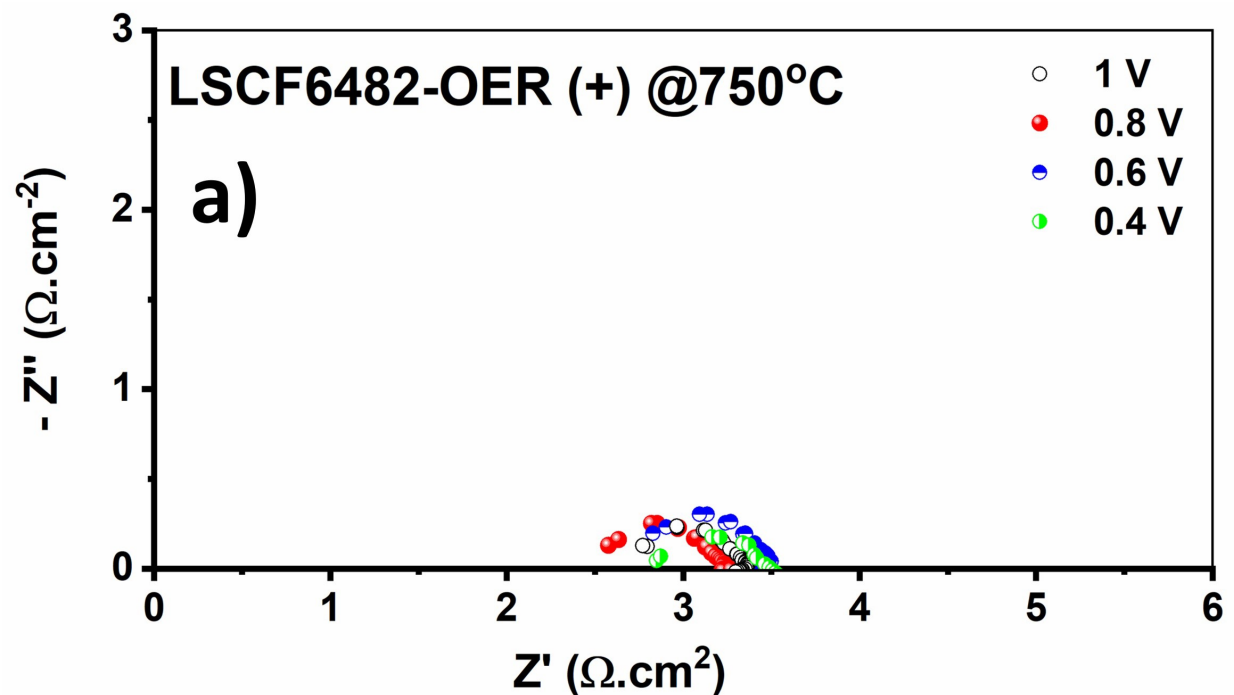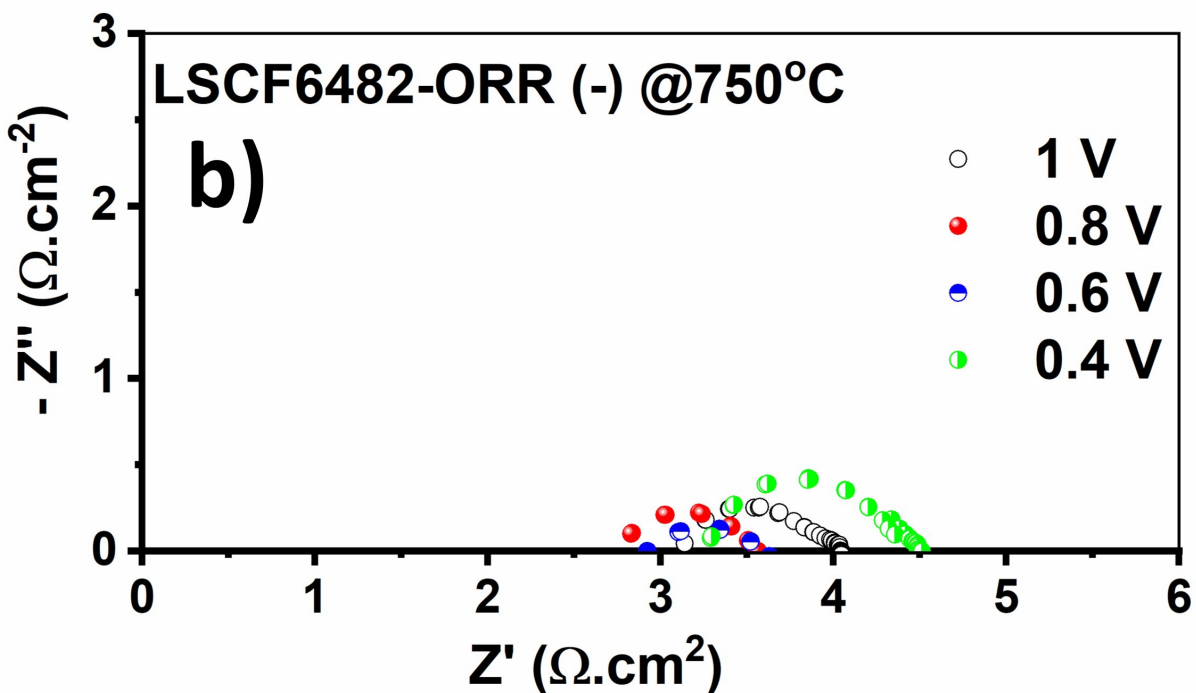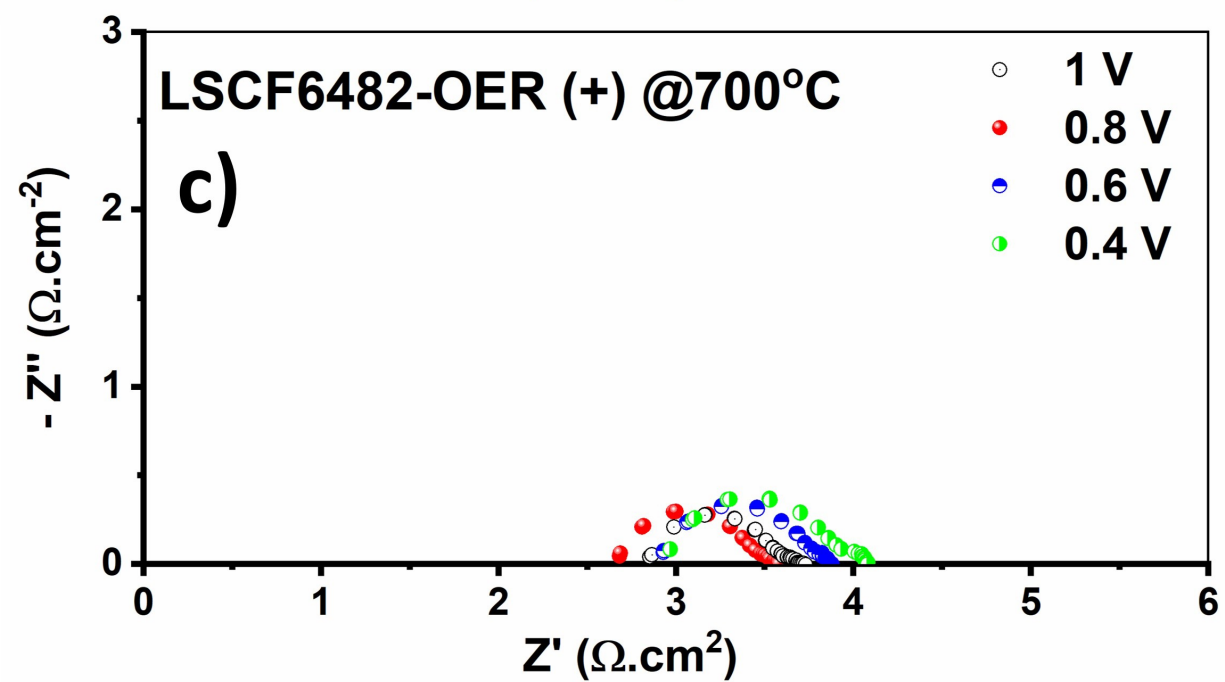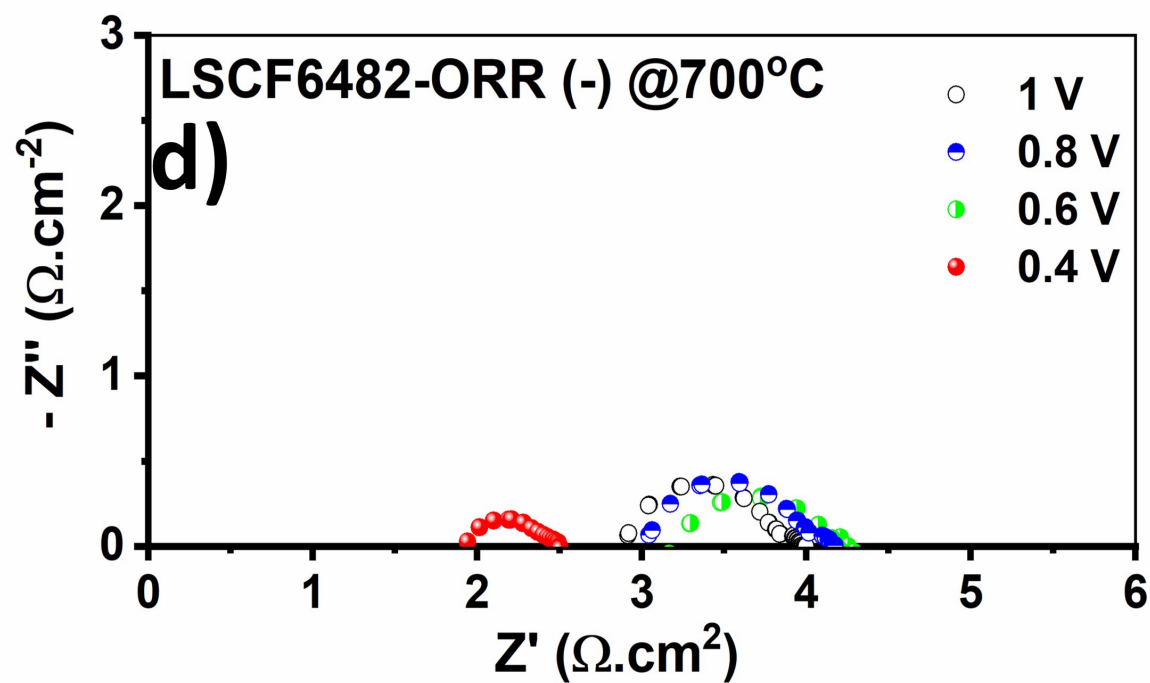

Supplement: d4ra05191b6.pdf [file d4ra05191b6.pdf]

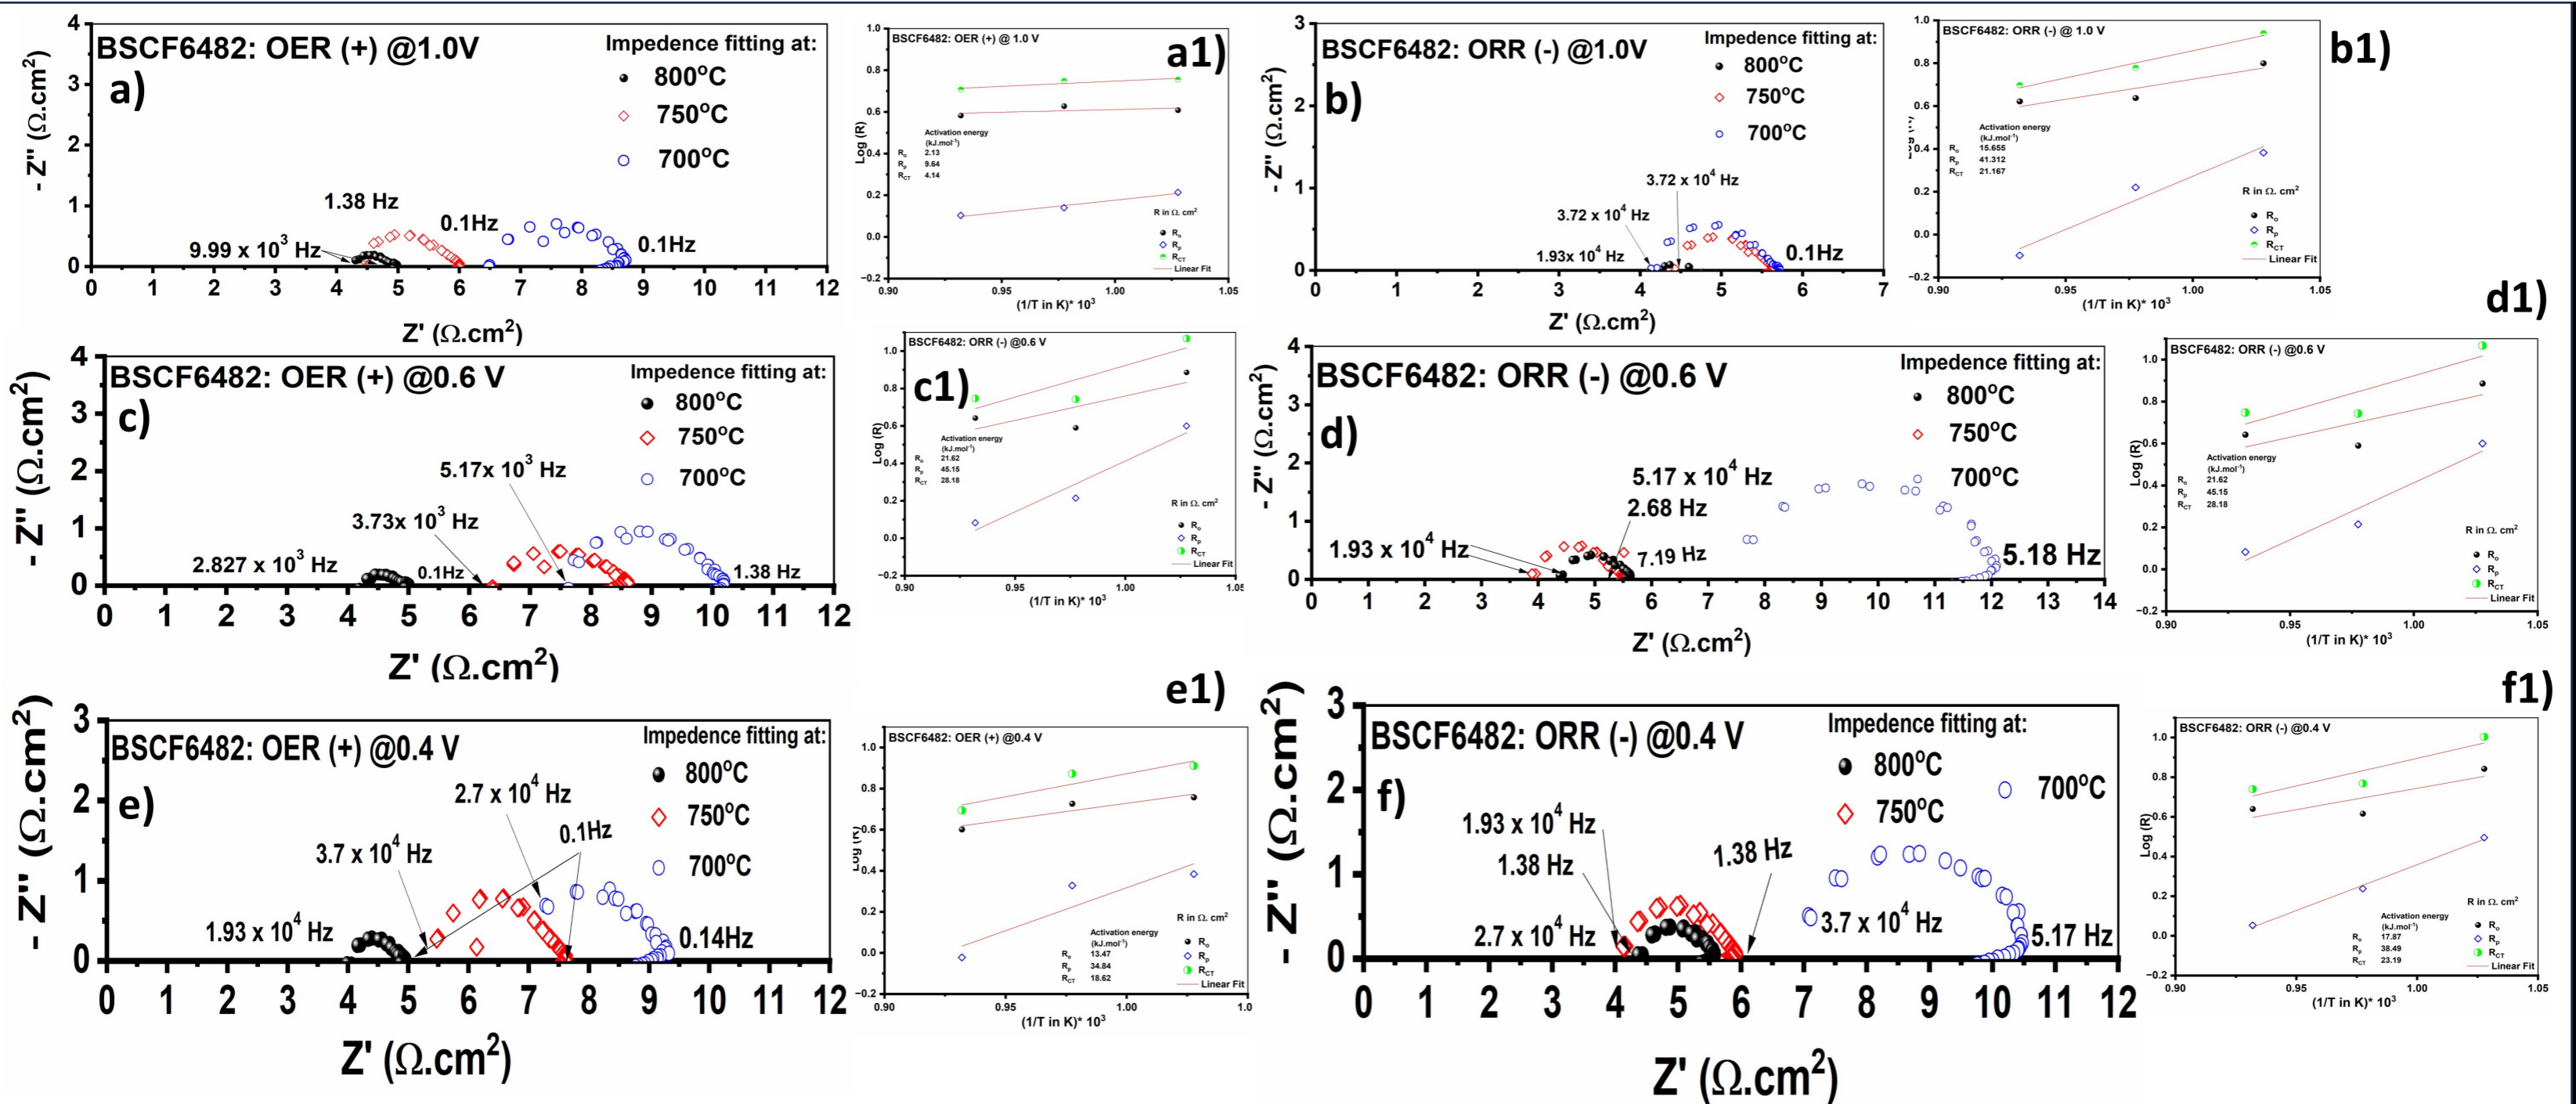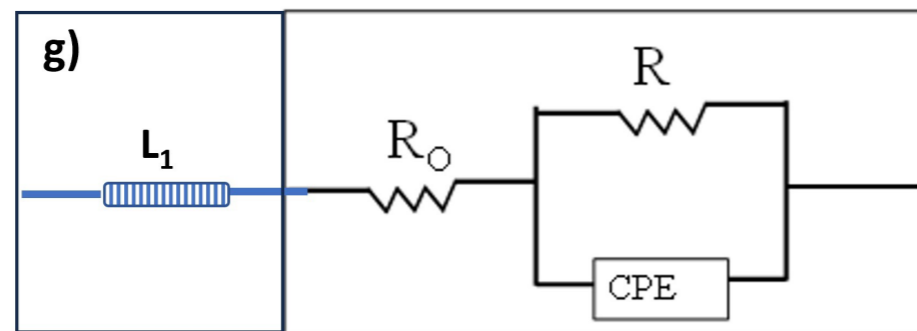

reduced to

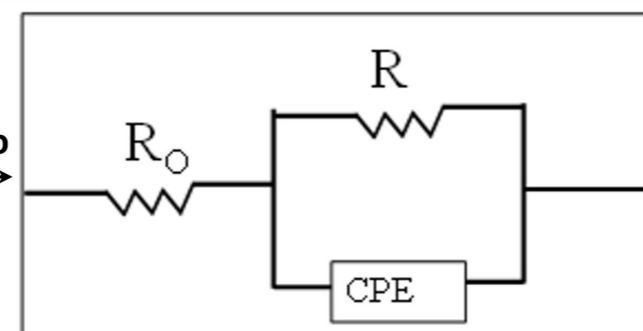

Supplement: d4ra05191b7.pdf [file d4ra05191b7.pdf]

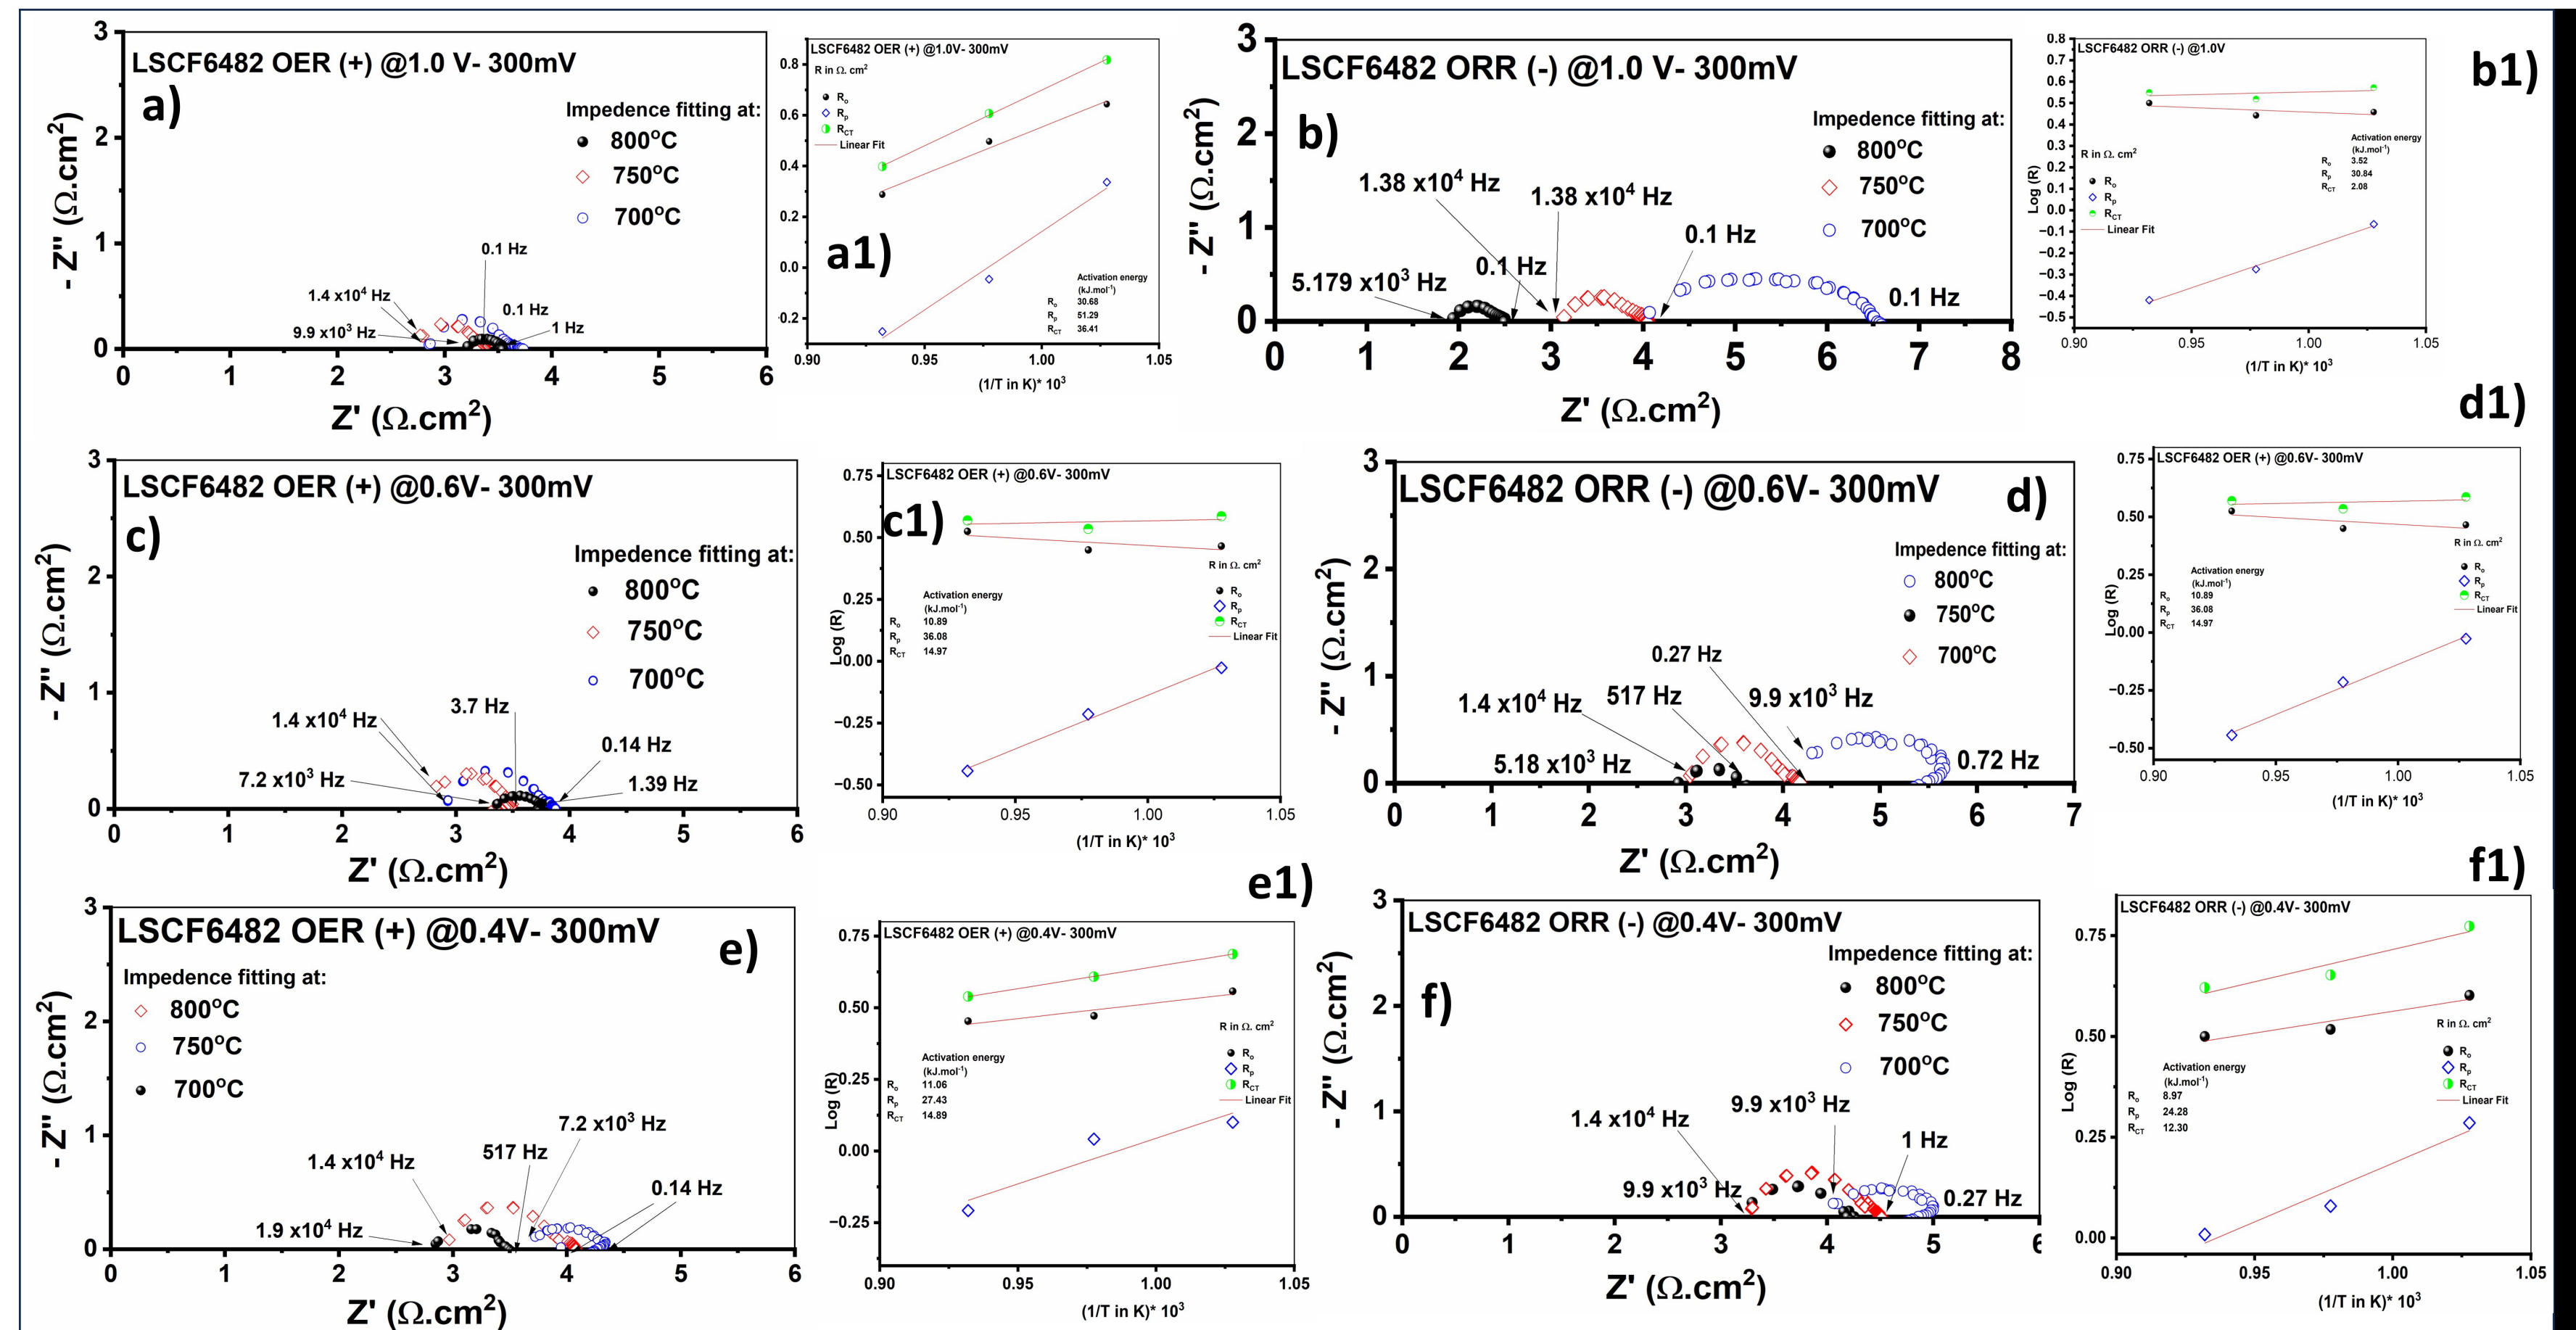

Supplement: d4ra05191b8.pdf [file d4ra05191b8.pdf]

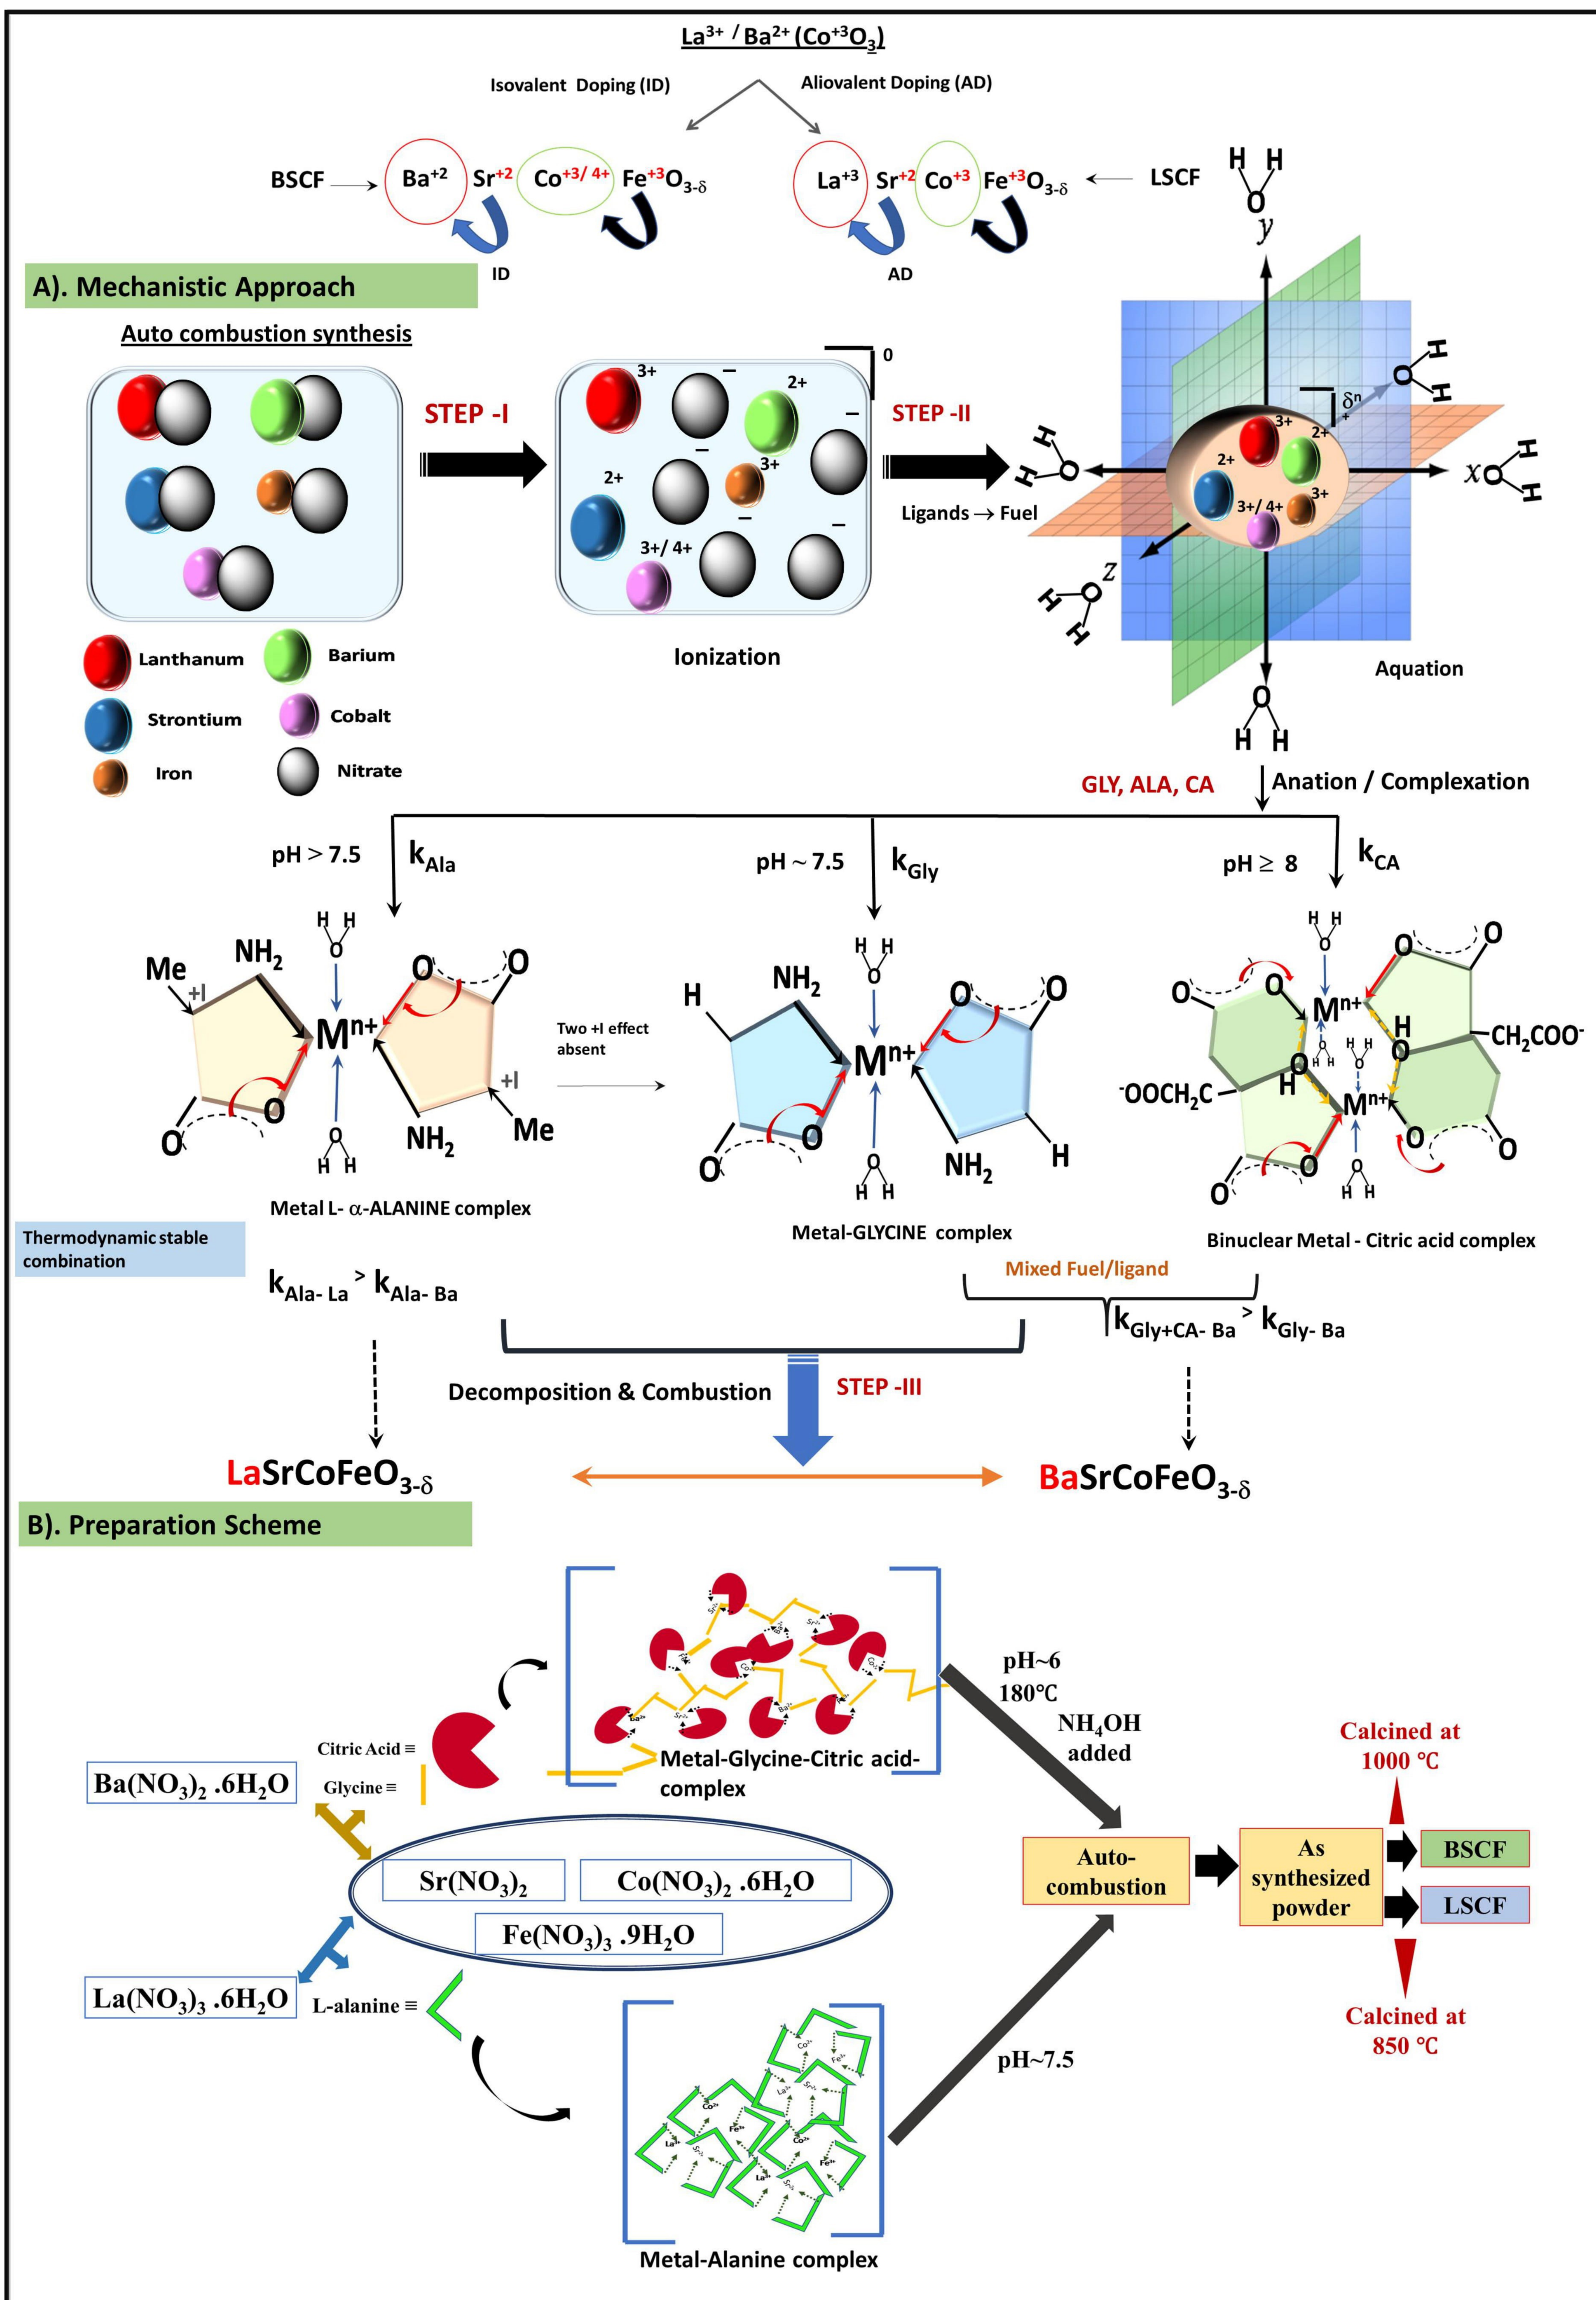

Supplement: d4ra05191b9.pdf [file d4ra05191b9.pdf]
